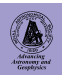

# Environmental regulation of cloud and star formation in galactic bars

F. Renaud,<sup>1★</sup> F. Bournaud,<sup>2</sup> E. Emsellem,<sup>3,4</sup> O. Agertz,<sup>1</sup> E. Athanassoula,<sup>5</sup> F. Combes,<sup>6</sup> B. Elmegreen,<sup>7</sup> K. Kraljic,<sup>5</sup> F. Motte<sup>2</sup> and R. Teyssier<sup>8</sup>

<sup>1</sup>Department of Physics, University of Surrey, Guildford, GU2 7XH, UK

<sup>2</sup>Laboratoire AIM Paris-Saclay, CEA/IRFU/Sap-CNRS/INSU, Université Paris Diderot, F-91191 Gif-sur-Yvette Cedex, France

<sup>3</sup>European Southern Observatory, D-85748 Garching bei Muenchen, Germany

<sup>4</sup>Université Lyon 1, Observatoire de Lyon, CRAL et ENS, 9 Av Charles André, F-69230 Saint-Genis Laval, France

<sup>5</sup>Ai Marseille Université, CNRS, LAM (Laboratoire d'Astrophysique de Marseille), F-13388 Marseille, France

<sup>6</sup>Observatoire de Paris, LERMA, PSL, CNRS, Sorbonne Univ. UPMC and Collège de France, F-75014 Paris, France

<sup>7</sup>IBM T. J. Watson Research Center, 1101 Kitchawan Road, Yorktown Heights, NY 10598, USA

<sup>8</sup>Institute for Theoretical Physics, University of Zürich, CH-8057 Zürich, Switzerland

Accepted 2015 September 22. Received 2015 September 7; in original form 2015 August 10

## ABSTRACT

The strong time-dependence of the dynamics of galactic bars yields a complex and rapidly evolving distribution of dense gas and star forming regions. Although bars mainly host regions void of any star formation activity, their extremities can gather the physical conditions for the formation of molecular complexes and mini-starbursts. Using a sub-parsec resolution hydrodynamical simulation of a Milky Way-like galaxy, we probe these conditions to explore how and where bar (hydro-)dynamics favours the formation or destruction of molecular clouds and stars. The interplay between the kpc-scale dynamics (gas flows, shear) and the parsec-scale (turbulence) is key to this problem. We find a strong dichotomy between the leading and trailing sides of the bar, in term of cloud fragmentation and in the age distribution of the young stars. After orbiting along the bar edge, these young structures slow down at the extremities of the bar, where orbital crowding increases the probability of cloud–cloud collision. We find that such events increase the Mach number of the cloud, leading to an enhanced star formation efficiency and finally the formation of massive stellar associations, in a fashion similar to galaxy–galaxy interactions. We highlight the role of bar dynamics in decoupling young stars from the clouds in which they form, and discuss the implications on the injection of feedback into the interstellar medium (ISM), in particular in the context of galaxy formation.

**Key words:** methods: numerical – ISM: structure – Galaxy: structure.

## 1 INTRODUCTION

In isolated disc galaxies in the local Universe in general and the Milky Way in particular, most of the star formation activity occurs in giant molecular clouds (GMCs) distributed within kpc-scale structures like spiral arms, where the interstellar medium (ISM) is about 100 time denser than in interarm regions (Visser 1980; Hughes et al. 2013). Such excess of star formation is also observed in the central regions of galactic bars, again because of high surface densities of molecular gas (Sheth et al. 2002, but see Longmore et al. 2013 on a deficit of star formation in the central molecular zone). Furthermore, the extremities of bars can host large amounts of molecular gas, distributed in massive complexes, also called giant molecular associations (Solomon et al. 1987; Martin & Friedli 1997; Nguyen Luong et al. 2011). Among them, the complex W43 at the tip of the

Milky Way bar gathers about  $9 \times 10^6 M_\odot$  of gas, embedded in a neutral hydrogen envelope of  $3 \times 10^6 M_\odot$  (Motte et al. 2014). This complex hosts a mini-starburst activity, with the ongoing formation of massive stars (Motte, Schilke & Lis 2003; Louvet et al. 2014). Using position-velocity data, Motte et al. (2014) proposed that such activity results from a collision between clouds accreted from a nearby spiral arm. However, because of the very short dynamical time-scales in such environment ( $\sim 10$  Myr) and the interplay between the numerous physical processes at stake, understanding the origin of molecular complexes, their lifetimes, and the physical conditions leading to enhanced star formation in bars is rather difficult observationally.

Numerical simulations provide a complementary approach to the problem, and have been long used to address the questions related to the dynamics and star formation in bars (see a review in Athanassoula 2013). Using sticky particle simulations, Combes & Gerin (1985) noted asymmetries in the distribution of dust lanes between the leading and trailing sides of bars. Such results have also been

★ E-mail: florent.renaud@gmail.com

established in hydrodynamical models (Prendergast 1983; Athanassoula 1992; Piner et al. 1995) which also showed that gas concentration on the leading side corresponds to shocks. These simulations have sufficiently high resolutions ( $\sim 100$  pc) to describe the inner structures of the bar. However, such pioneer studies faced technical limitations and could not resolve how these features fragment (or not) into molecular clouds ( $\sim 10$  pc). Although modern simulations still face the long-lasting issue of coupling between the kpc-scale dynamics of the galaxy and the parsec and sub-parsec physics driving star formation and the associated processes like feedback, technical improvements in high performance computation push further the limitations. Present-day galaxy simulations now encompass both scales at once (see e.g. Dobbs, Pringle & Burkert 2012; Bonnell, Dobbs & Smith 2013; Fujimoto et al. 2014).

Using the model of the Milky Way presented in Renaud et al. (2013), we address here some of the questions related to the evolution of the structure of the ISM and the formation of stars in a galactic bar, focusing on the regions at their tips. The main advantage of this simulation is to describe the evolution of the ISM and the formation of stars by resolving the giant molecular clouds at parsec and sub-parsec scales, within a ‘live’ galactic context, i.e. with no forcing of the potential nor of the spiral or bar pattern. Therefore, this simulation encompasses both dynamical aspects from the kpc scales like tides, shear, disc rotation, and local parsec and sub-parsec effects like cloud self-gravity, turbulence, and stellar feedback. This paper aims at providing comprehensive scenarios for the formation of gaseous structures, their fragmentation into molecular clouds, the interaction of these clouds, and the potential formation of molecular complexes like W43.

## 2 NUMERICAL SIMULATION

Details of the galaxy simulation used in this work are presented in Renaud et al. (2013) and summarized here. We have run a hydrodynamical simulation of a Milky Way-like galaxy in isolation, using the adaptive mesh refinement code RAMSES (Teyssier 2002). The initial conditions are axisymmetric distributions of stars (bulge and discs) and dark matter halo rendered with particles, and gas modelled by an exponential disc on the mesh of the simulation. The stellar component forms spirals and a bar within a few  $10^8$  yr (see Emsellem et al. 2015). The gas then naturally follows this potential well, and further fragments to form its own structures. The formation and evolution of stellar and gaseous structures naturally arise from the dynamical evolution from axisymmetric initial conditions and are not regulated by a pattern speed nor a fixed potential.

In a cubic box 100 kpc wide, the maximum resolution reached is 0.05 pc for a cloud crossing time (i.e. a few  $10^6$  yr), and sub-parsec resolution for a few cloud lifetimes (i.e. several 10 Myr). The equation of state, which is a fit to the actual thermal heating/cooling balance, mimics a hot diffuse halo ( $10^{5-7}$  K), an isothermal warm phase ( $10^4$  K up to  $\approx 10^{-1}$  cm $^{-3}$ ) and a polytropic branch at high density, down to 14 K. In Milky Way-like galaxies, only a moderate amount of gas lies off the adopted equation, and the heating and cooling processes make it rapidly fall back on to the relation, such that this equation of state provides a good approximation to more elaborate implementations, as shown in Kraljic et al. (2014). A pressure floor (for gas denser than  $\approx 2 \times 10^5$  cm $^{-3}$ ) ensures that the local Jeans length is always resolved by a few cells.

Star formation proceeds at a constant efficiency per free-fall time in the gas denser than 2000 cm $^{-3}$  (which corresponds, on average over the galaxy, to the transition where self-gravity takes over the supersonic turbulent dominated regime, visible as a power-law tail

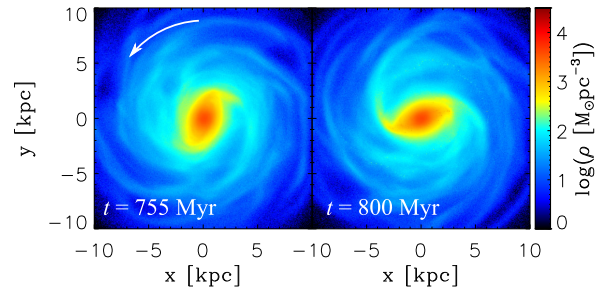

**Figure 1.** Map of the stellar component of our Milky Way model (seen face-on) at the beginning and the end of our period of interest. (The bar rotates anticlockwise in all our figures.)

in the otherwise lognormal density probability distribution function, see Renaud et al. 2013, their fig. 10). The prescription for stellar feedback consists in various phenomenological recipes for photoionization in H II regions (by setting the temperature of Strömgren spheres to  $2 \times 10^4$  K), radiative pressure (by deposition of radial velocity kicks in these spheres), and kinetic supernova (SN) blasts (Renaud et al. 2013). No magnetic field has been included.

The snapshot at  $t = 800$  Myr (with  $t = 0$  corresponding to the initial conditions of the simulation) provides a good match to the observational data of the Milky Way, in term of morphology and kinematics. Although some fine features are absent of the model (e.g. the nuclear ring at 200 pc), the main structures of the Milky Way (bar, spiral arms) are well reproduced (see Renaud et al. 2013; Chemin, Renaud & Soubiran 2015; Emsellem et al. 2015). In that sense, although it is still utopian to compare the simulation with observations at the level of individual GMCs, this model can confidently be used to probe the average physical conditions of the real Galaxy and address the questions of formation and evolution of GMCs from a statistical perspective.

In this contribution, we study the formation of gas clouds and stars in the outer parts of the bar. The (hydro-)dynamics of the innermost kpc, and the coupling between the large-scales and the central black hole is presented in Emsellem et al. (2015). We focus our analysis between  $t = 755$  and  $t = 800$  Myr to monitor the physical conditions leading to the formation of clouds and then to stars (Fig. 1). Running the simulation at sub-parsec resolution over this period would be too costly. Instead, the resolution is progressively increased, from 3 to 0.05 pc, one refinement level at a time. Before activating a finer level, we let the simulation run for several free-fall times of the densest structures, to ensure the signatures of previous refinements have been erased. Star formation and feedback are however active throughout the analysed period. Note that the effective resolution controls the fragmentation level of the ISM, which enables us to allow for the formation of spirals and bar while preventing that of molecular clouds during the earliest epochs of the simulation ( $\sim 3-4$  rotation periods) to avoid a too flocculent disc. The coarsest resolution is however sufficient to describe the properties of the ISM at the scale of molecular clouds (several 10 pc), but without being able to describe their inner structures.

The bar formed at  $t \approx 600$  Myr and evolved from a weak bar (maximum amplitude of the tangential to radial force ratio of  $Q \approx 0.2$  at  $t = 700$  Myr) to a stronger bar ( $Q \approx 0.6$  at  $t = 800$  Myr, see Emsellem et al. 2015, their section 3.1). At  $t = 800$  Myr, the bar pattern-speed is  $\approx 58$  km/s/kpc (with co-rotation found at 3.6 kpc). Its semimajor axis is 2.4 kpc, with an axis ratio of 1:3. Inner Lindblad resonances, as computed from the azimuthally averaged mass distribution, are found at 40 and 450 pc from the galactic centre.

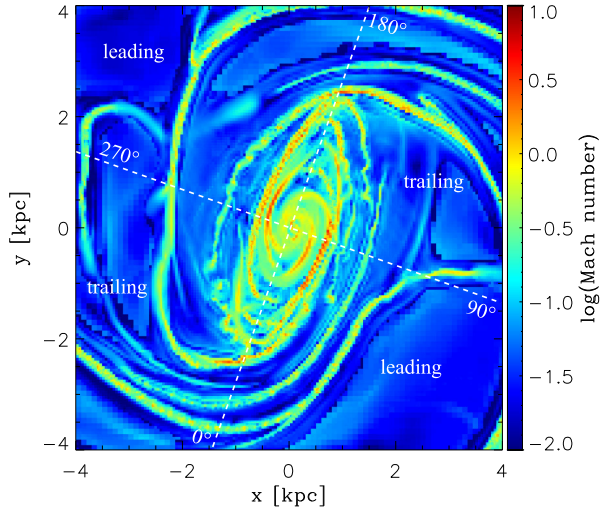

**Figure 2.** Map of the gas density (at  $t = 755$  Myr), in the bar and the inner region of the disc.

More details on the evolution of the disc and the bar can be found in Renaud et al. (2013) and Emsellem et al. (2015).

### 3 RESULTS

Fig. 2 shows the density of gas at  $t = 755$  Myr, before most of the star forming clumps form in the bar. Using this snapshot allows us to measure the physical conditions of cloud formation. Gas has already gathered in dense structures, following the gravitational potential of the stellar component, and is at the turning point of fragmenting into clouds. Some regions along the outermost spiral arms (e.g. on lower part of Fig. 2) already host beads-on-a-string clouds (Elmegreen & Elmegreen 1983; Renaud et al. 2013), which are still in the phase of accreting their surrounding material. Gravitational torques from the bar and resonances regulate the gas flows towards the centre along mini-spirals, in particular inside the inner kpc, as discussed in Emsellem et al. (2015).

#### 3.1 Turbulence

At the scale of 24 pc, only a few regions yield supersonic turbulence (Fig. 3): the leading edges of the bar (as observed by Sheth et al. 2002) and, to a lower extent, the two main spiral arms close to the points where they connect to the bar. (The turbulent Mach number is computed as in Kraljic et al. 2014, their section 4.1.) To further illustrate this point, Fig. 4 displays the azimuthal profile of the turbulent Mach number along the edge of the bar, confirming the presence of a leading versus trailing asymmetry.

These high turbulent Mach numbers mostly originate from a velocity dispersion ( $\sim 20 \text{ km s}^{-1}$ ) about 2–10 times larger in these regions than elsewhere along the bar edge (where density, temperature, and thus sound speed are comparable). The locations of these regions suggest the presence of a supersonic shock between the edge of the rotating bar ( $\sim 60 \text{ km s}^{-1} \text{ kpc}^{-1}$ ,  $50 - 500 \text{ K}$ ,  $\sim 10^{2-4} \text{ cm}^{-3}$ ) and the warm neutral medium ( $2500 - 3000 \text{ K}$ ,  $\sim 10 \text{ cm}^{-3}$ ) surrounding it. (Note that hotter and more diffuse interarm medium is found at larger radii, and only faces the spirals and not the bar itself.) Oppositely, the inner region of the bar stands in transonic and subsonic regimes.

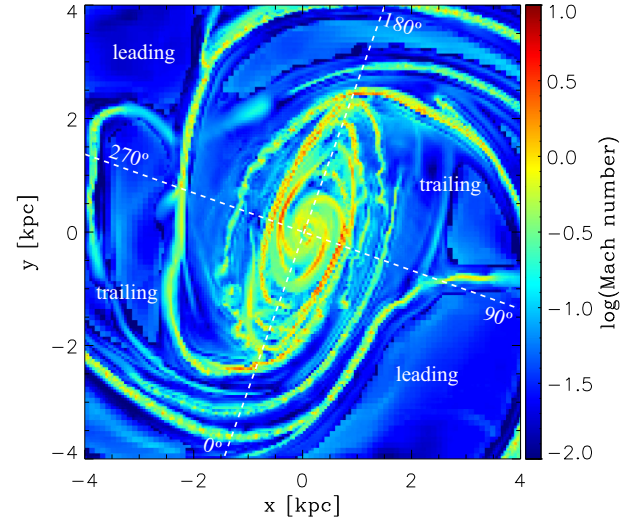

**Figure 3.** Map of the turbulent Mach number evaluated at the scale 24 pc. Dashed lines indicate the major and minor axes of the bar, and thus tell apart the leading and trailing quadrants. The highest turbulent Mach numbers are found on leading edges of the bar, where the ISM gets supersonically shocked.

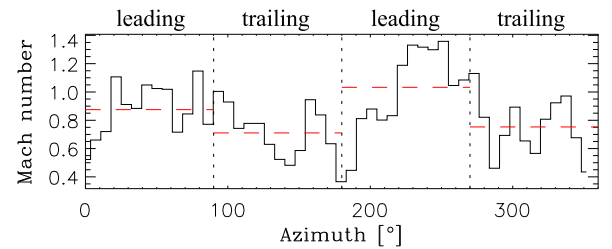

**Figure 4.** Azimuthal profile of the turbulent Mach number (computed at the scale of 24 pc), along the edge of the bar. The edge is here defined as an ellipse of semimajor and semiminor axes 1.8 and 0.7 kpc respectively, and with an inclination of  $72^\circ$  with respect to the axis  $x = 0$  (see Fig. 3). To account for the non-perfectly ellipsoidal nature of the bar and include the densest gas features, data are extracted in a ring spanning 250 pc on both the inner and outer sides of this ellipse. Azimuths are indicated in Fig. 3. On each quadrant (matching those displayed in Fig. 3), a horizontal dashed line indicates the average turbulent Mach number. The leading sides of the bar host regions with higher turbulent Mach numbers than the trailing quadrants.

Number of studies revealed that, on top of the turbulent Mach number which describes the level of turbulence of the ISM, the nature of the turbulence can also be key in the formation and evolution of dense gas structures (see e.g. Wada, Meurer & Norman 2002; Kritsuk et al. 2007; Federrath et al. 2010 at cloud-scales, and Renaud et al. 2014 at galactic scales). This complementary aspect can be probed by measuring the relative importance of the compressive (curl-free) and solenoidal (divergence-free) modes of turbulence. To do so, we follow the method presented in Renaud et al. (2014, their appendix A). The divergence and curl of the velocity field are computed with first-order finite differences using a group of  $2^3$  grid cells. In such scheme, the large-scale component of the total velocity field (i.e. the non-turbulent term) cancels out, and only the turbulent components of the velocity field remain. By multiplying the divergence (respectively curl) by the scale-length over which it is evaluated (i.e. the cell size), one reconstructs the compressive (respectively solenoidal) velocity, which then can be expressed as a kinetic energy. Note that the curl-free component



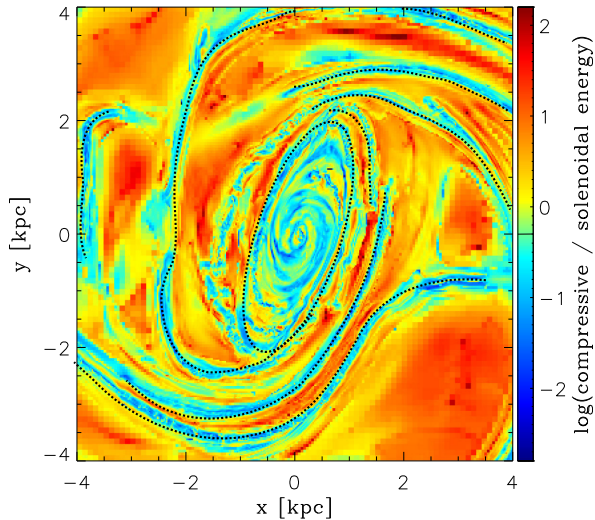

**Figure 5.** Ratio of the compressive turbulence energy (encompassing both compression and rarefaction) to the solenoidal turbulence energy, both evaluated at the scale of 24 pc. The dotted ellipse and lines indicate the approximate location of the densest gas structures along the edge of the bar and the spiral arms. The horizontal mark in the colour bar indicates energy equipartition between the two turbulent modes (i.e. a ratio of 1/2, see text for details).

represents both a compression and a rarefaction effect, but we refer to it as compressive mode, for short.

Fig. 5 maps the ratio of the energies of the two turbulent modes. Because the compressive mode carries one degree of freedom, while the solenoidal mode has two, energy equipartition between the two modes is reached when their ratio equals one half. The discrete nature of the grid on which the motions are represented implies that this ratio is overestimated if evaluated over too few resolution elements (see Federrath et al. 2011). By varying the resolution at which we compute the map of Fig. 5, we ensured that convergence is reached at 24 pc, i.e. over at least 8 cells.<sup>1</sup>

Sharp density gradients, across the spiral arms and at the edge of the bar, are often associated with a change from compressive- to solenoidal-dominated turbulence. Most of the dense structures (bar and spirals) yield turbulence close to equipartition, or slightly solenoidal dominated, indicating the presence of local shear motions. Only the low-density gas (mostly in the interarm regions) yields a compressive-dominated turbulence (rarefaction) over kpc-scale volumes. Recall that at this stage of the simulation, star formation has not taken place yet and thus, this turbulence is not generated by feedback, but only by the large-scale (hydro-)dynamics. Later, the turbulence pumped by stellar feedback at parsec scales will combine with that injected at kpc-scale by the galactic dynamics.

Along the bar edge, the leading versus trailing dichotomy noted in Figs 3 and 4 for the Mach number is not recovered in the nature of turbulence. The regions along the edge share comparable turbulence

as the spiral arms. No major differences are found between the edge of the bar and the central kpc. The main differences in the organization of the ISM is thus originating from large-scale aspects like shear (see next section).

Therefore, at the scale of molecular clouds, the overall turbulence intensity (Mach number) shows a rather strong dependence on the galactic environment, leading to differences in the structure of the ISM and the further formation of dense clouds. The nature of turbulence (compressive versus solenoidal) in the dense gas structures is however fairly independent of the kpc-scale structures, contrarily to interacting galaxies where it is mostly compressive (Renaud et al. 2014). The reason for this might be that compressive tides, which are thought to drive large-scale compressive turbulence in interacting galaxies, do not exist over kpc-scale volumes in isolated galaxies.

This picture remains valid at later stages in the simulation, even after the formation and collapse of clouds.

### 3.2 Large-scale velocity field

Orbital motions inside the bar induce a shearing effect on the ISM (see Athanassoula 1992; Emsellem et al. 2015). Such shear prevents the formation of dense structures like clouds, which later translates in a lack of star formation *inside* the bar, despite relatively high densities. At the edge of the bar however, supersonic turbulence (as discussed above) balances a weaker shear (and tides) than in the innermost regions, and favours the formation and survival of overdensities.

Fig. 6 shows the maps of the radial and tangential components of the gas velocity in the reference frame of the bar. The highest radial velocities are found along the edge of the bar (pointing inward on the leading sides and outward on the trailing sides). Shear is clearly visible perpendicular to the bar major and minor axes (in particular in radial velocity), whereas kpc-size regions along the edge show almost uniform velocities. In (relative) absence of large-scale shear in the latter areas, small-scale ( $< 100$  pc) motions dominate the velocity field, which translates into the turbulence patterns discussed in the previous section.

Fig. 7 displays the velocity component parallel to the bar minor axis along three slits, following the approach of Athanassoula (1992, her fig. 11). In the outermost regions considered here, overdensities correspond to spiral arms. Any of the associated velocity profiles *within* the arm (i.e. over  $\sim 100$  pc) is monotonically decreasing, which indicates converging flow towards the arm centre. At larger scale, the flows are set by the disc dynamics and thus vary with location.

The innermost dense gas structures (only visible in the central slit) match the positions of the inner Lindblad resonances, at 40 and 450 pc. The gas is fuelled there along mini-spiral arms by the gravitational torques of the bar and piled up on these stable orbits (see Renaud et al. 2013; Emsellem et al. 2015). Regions in between these orbits yield either low velocities or diverging flows, which participate in the lack of cloud and star formation in this area.

At the edge of the bar ( $0.5 \text{ kpc} \lesssim |x| \lesssim 1 \text{ kpc}$ ), the densest structures match steep velocity gradients, i.e. shocks, especially on the leading side of the bar ( $x \approx 300 \pm 100 \text{ pc}$  for S1 and  $x \approx 600 \pm 100 \text{ pc}$  for S3), which confirms the findings of Athanassoula (1992). On the trailing side, the velocity profile is mostly symmetric over a few 100 pc, which simply denotes the rotation of the bar.

However, structures at intermediate radii and on the trailing side are not systematically associated with shocks. The difference originates from the velocity component perpendicular to the minor axis

<sup>1</sup> In the lowest density regions (e.g. the interarm), the adaptive nature of the grid refinement implies that the cell size is larger than in denser zones like the bar and the spiral arms. Because of this, at fixed scale, the turbulent modes are computed over fewer resolution elements, and thus the importance of the compressive mode there (as a rarefaction effect) is overestimated. In our case, only the extreme values in overcompressive regions (of very low density) are significantly changed (up to a factor of 3 in the most extreme cases), but the overall behaviour remains unaffected if quantities are computed at 100 pc scale instead of 24 pc.

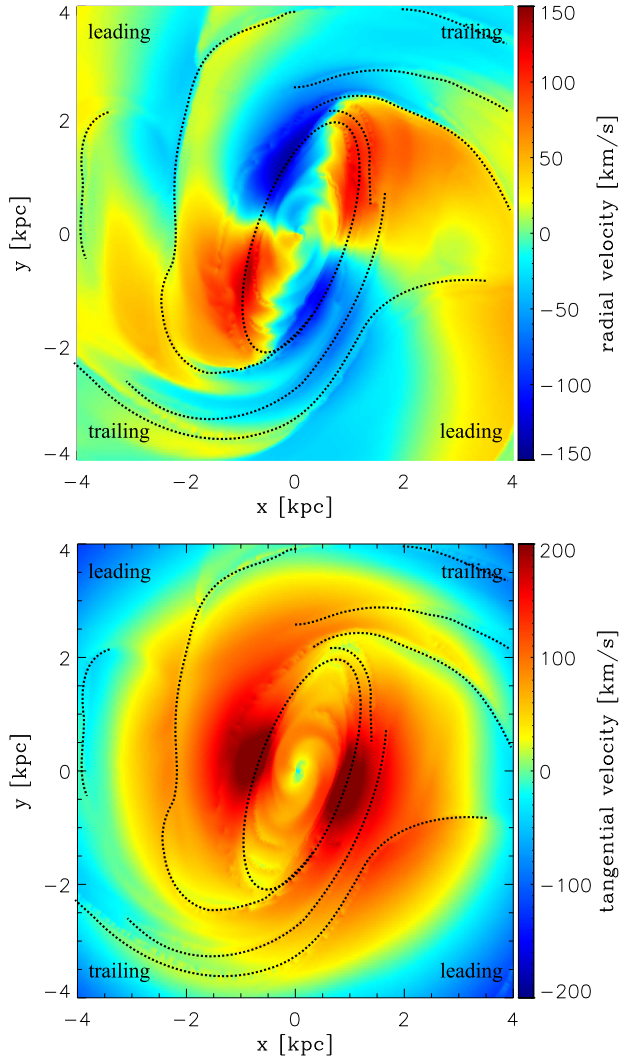

**Figure 6.** Top: gas radial velocity. Blue and red indicate inward and outward motions, respectively. Bottom: gas tangential velocity, minus the pattern speed of the bar ( $58 \text{ km/s/kpc}$ ). Blue and red indicate clockwise and anticlockwise motions, respectively. The dotted ellipse and lines indicate the approximate location of the densest gas structures along the edge of the bar and the spiral arms.

of the bar, of which profile is displayed in Fig. 8. Dense gas structures associated with shocks (i.e. with steep parallel velocity profiles in Fig. 7) are found in zones of low shear (i.e. flat perpendicular velocity profiles Fig. 8), particularly close to the edge of the bar, and in a few  $\sim 100 \text{ pc}$ -scale regions where the perpendicular velocity profile locally flattens.

Such relatively weak shear, combined with high densities and strong turbulence (recall Section 3.1), shapes elongated dense gaseous structures and allows for their survival until they fragment into clouds. Most of the material found there does not spiral inside the bar but remains on the bar edge and circulates around the bar (on  $x_1$ -type orbits, see Contopoulos & Grosbøl 1989; Skokos, Patsis & Athanassoula 2002) at high velocity (up to  $230 \text{ km s}^{-1}$  in the bar reference frame). It takes about  $20 \text{ Myr}$  to travel from one of its apocentre to the next (on the other side of the bar,  $\approx 3 \text{ kpc}$  on average). The eccentric nature of this motion makes the gas slow down ( $\sim 40 \text{ km s}^{-1}$ ) when it reaches the apocentre, i.e. the extremities of the bar (along the major axis). Here, the spread in orbital energies

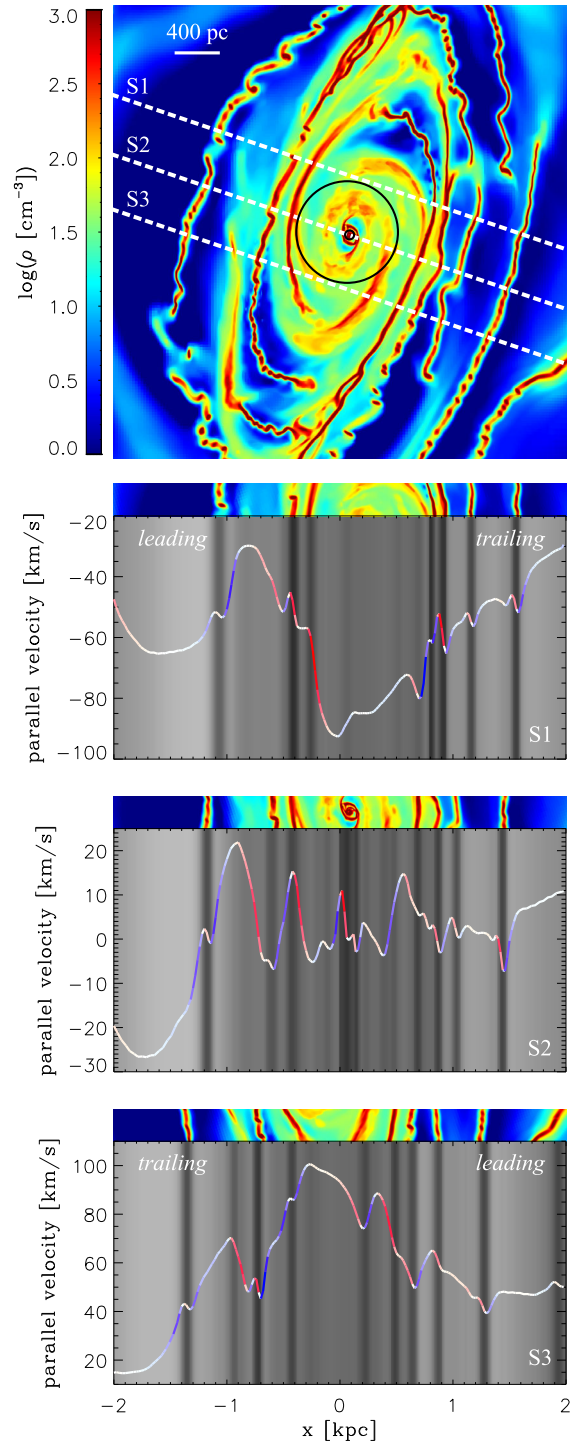

**Figure 7.** Top: gas density map of the bar (as in Fig. 2). The black circles show the inner Lindblad resonances (40 and  $450 \text{ pc}$ ). The three dashed lines indicate the position of ‘slits’ parallel to the minor axis, and shifted along the vertical axis by  $500, 0$ , and  $-500 \text{ pc}$ . The bottom three panels show the velocity component parallel to the minor axis, along the three slits (with the convention of positive velocity representing motion from left to right). To ease the interpretation, the background grey-scale image represents the logarithm of the gas density and the curve colour codes the local velocity gradient. With the sign convention adopted, red indicates a converging flow, blue a diverging flow, white and symmetric features denote bulk motions. A density map of the corresponding region is shown above each panel to help the identification of structures.

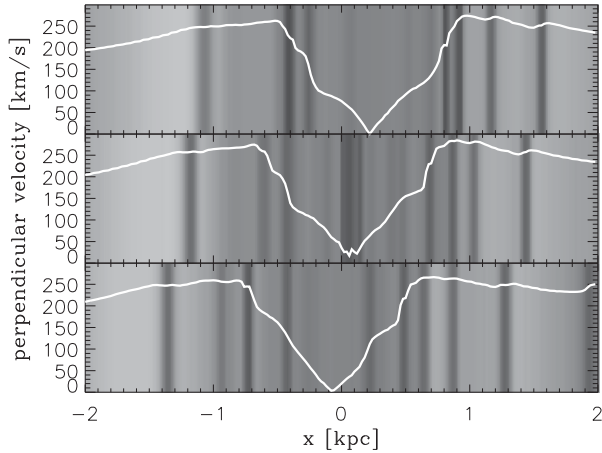

**Figure 8.** Profile of the velocity component perpendicular to the minor axis, along the three slits shown in Fig. 7. Background indicates the gas density in the slits, as in Fig. 7.

translates into a radial spread of apocentres, such that the material coming from the thin filaments parallel to the bar spans a large area (about  $1 \text{ kpc}^2$ , between  $\sim 1$  and  $\sim 2 \text{ kpc}$  away from the galactic centre). Despite this large volume in space, the slowing down of gas clouds makes them accumulate there (before being accelerated again along the opposite bar edge). We identified about 50 dense clouds ( $>2000 \text{ cm}^{-3}$ ) at each extremity of the bar, with a velocity dispersion between them of  $\sim 40 \text{ km s}^{-1}$ . This accumulation in space and time, so-called orbital crowding (Kenney & Lord 1991), increases the probability of cloud–cloud collisions, as already noted by Rodríguez-Fernández & Combes (2008). Such events lead to star formation, as discussed in Section 3.4.

### 3.3 Young stars

The natural consequence of the formation of dense clouds is that self-gravity will eventually take over regulating mechanisms and will lead to cloud collapse and star formation.

Fig. 9 shows the spatial distribution and the age of the new stellar particles (i.e. the stars formed out of gas during the simulation), about 45 Myr after the instant previously discussed, once the clouds have formed, collapsed, and began to form their stellar material. The lack of star formation in the inner bar (except at the very centre) is caused by the strong shear destroying clouds in this region (Emsellem et al. 2015, see also Fig. 8), and the orbital pattern preventing stars formed elsewhere to enter this area.

One can tell apart three stellar populations: (i) the very young stars ( $<20 \text{ Myr}$ ), (ii) the intermediate class (between 20 and 40 Myr old), and (iii) the older population ( $>40 \text{ Myr}$ ). (These classes are defined arbitrarily, only for the sake of clarity.)

As expected, the very young stars are found associated with dense gas structures: along the spiral arm connected to the tip of the bar (i.e. in the elongated blue feature on the left-hand side of the figure), and in central regions of some dense clumps at the tip of the bar itself (bottom panel), with the notable exception of the massive clump on the edge of the bar ( $x \approx -0.1 \text{ kpc}$ ,  $y \approx -0.8 \text{ kpc}$ ) which will be discussed in Section 3.4.

The intermediate age stars ( $20 \text{ Myr} < \text{age} < 40 \text{ Myr}$ ) are preferentially found at the tip of the bar, but on the trailing side (upper half of the bottom panel of Fig. 9). Their ages indicate that they formed at the opposite tip of the bar and have travelled along the (upper) edge of the bar within the last  $\sim 20$ – $40 \text{ Myr}$ , at the high

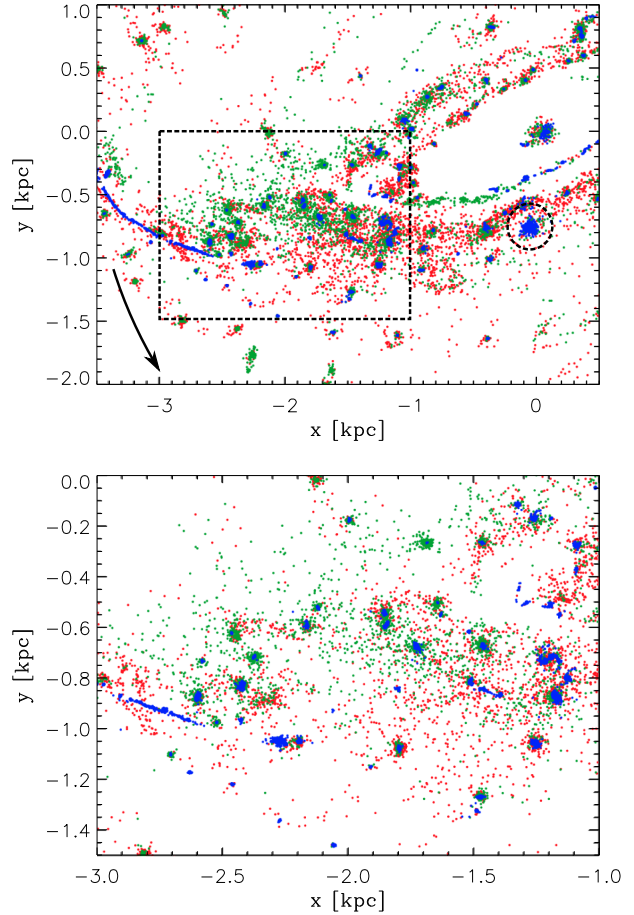

**Figure 9.** Age of the young stars in the vicinity of the tip of the bar at  $t = 800 \text{ Myr}$  (i.e.  $\approx 45 \text{ Myr}$  after the instant shown in Fig. 2). Only one side of the bar is shown, for the sake of clarity. An arrow indicates the rotation of the bar. The object circled is discussed in Section 3.4. The bottom panel shows a zoom-in of the rectangle area in the top panel. We consider three age bins:  $<20 \text{ Myr}$  (blue), between 20 and 40 Myr (green), and  $>40 \text{ Myr}$  (red).

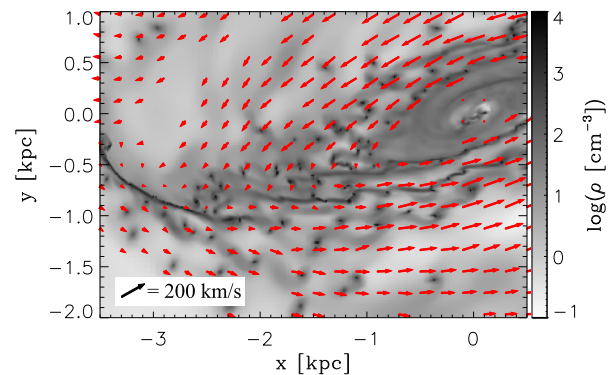

**Figure 10.** Velocity field of the young stars, in the reference frame of the bar ( $58 \text{ km/s/kpc}$ ), in the same region and at the same epoch as in Fig. 9. The background displays the gas density map. Like the clouds, the stars slow down when reaching the extremity of the bar.

velocity noted above. When reaching this extremity of the bar (i.e. their orbital apocentre), these stars slow down, as shown in Fig. 10. They stay in the area of the tip of the bar for  $\sim 20 \text{ Myr}$  before being slingshot along the leading side of the bar (bottom of Figs 9 and 10)



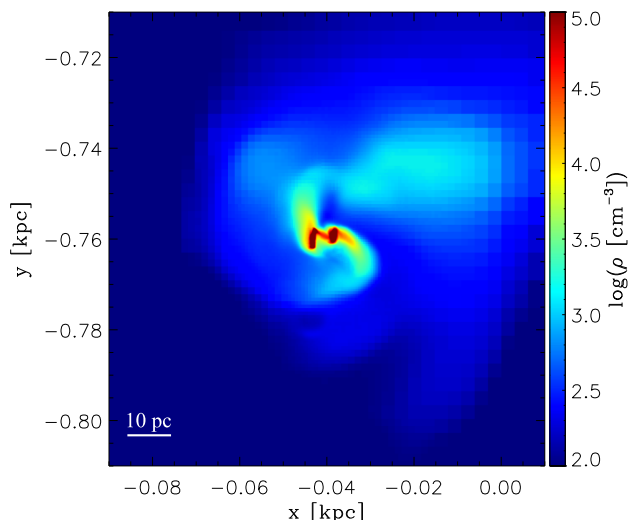

**Figure 11.** Gas density map in the region of interacting clouds along the edge of the bar (at  $t = 800$  Myr). Signatures of cloud–cloud interaction are visible, as tidal tails and bridges made of dense gas.

towards the other tip. This explains that stars on the leading side of the tip are a couple of 10 Myr older than those on the trailing side: they aged in the area of the tip.

By tracking back the origins of the stars found at the extremity of the bar (by selecting all stars in the bottom panel of Fig. 9), we find that about 50 per cent of them form in spiral arms and are accreted later by the bar, with the furthest formation site being 4.5 kpc away from the galactic centre. Among this accreted population, about half (55 per cent) originates from the main spiral arms connected to the bar, while the other half forms along a secondary structure, equivalent to the 3-kpc arm (or Norma arm) in the real Galaxy. While these stars form in clusters, the dynamics of the accretion (shear and tides) makes most of these objects dissolve before they reach the extremity of the bar. They participate in populating the ‘field’, as opposed to the clustered distribution of the young stars formed *in situ*, as visible in Fig. 9.

To summarize, the highly dynamical environment of the galactic bar directly influences the spatial distribution of young stars. It is however likely that the stellar populations will mix over several orbital periods ( $\sim 100$  Myr) and that the long-term evolution of the bar and the associated orbits would amplify this mixing process.

### 3.4 Cloud–cloud collisions and W43-analogue

The cluster of young stars at the position  $x \approx -0.1$  kpc,  $y \approx -0.8$  kpc in Fig. 9 stands out, both in terms of age (5 Myr on average) and mass ( $3 \times 10^6 M_\odot$ ). The on-going star formation in this region contrasts with the surrounding stellar material that has formed either at the tip of the bar a few  $\sim 30$ – $40$  Myr before, or even earlier elsewhere along the bar or in the spiral arms. The reason for this is the interaction of two gas clouds in this region. Fig. 11 shows the distribution of gas, in the densest regions of the clouds, which exhibits tail features. These tails are a signature of the past and still on-going tidal interaction between the clouds, in a very similar fashion as interacting galaxies exhibit long tails at much larger scale (e.g. Duc & Renaud 2013).

The Eulerian nature of the code used makes it difficult to track the cloud progenitors back. However, by tracking back the stellar particles found in this structure, we are able to get insights into the formation of this object. Fig. 12 shows the identification of the clouds in earlier snapshots, respectively 30 and 15 Myr before the

instant of Figs 9 and 11. The two progenitors visible in Fig. 11 are labelled ‘P1’ and ‘P2’ here. (Distinguishing which is which in Fig. 11 is impossible because of a too low time sampling of the simulation snapshots compared to their orbital time-scale around each other, and because their stellar contents are too spatially extended, such that they overlap on the late snapshot.)

P2 is itself the result of a merger of (at least two, but possibly more) beads-on-a-string clouds that formed along a spiral arm. By visual identification with the real Galaxy, these clouds would be found in the Norma arm, as labelled in Fig. 12. Approximately when the P2 structure crosses the bar major axis, at its extremity, orbital crowding makes its two components interact and merge. A few per cent of the stellar content of the final object (Fig. 9) is formed during this event, but a significant fraction of the stellar production gets unbound and gets mixed with field stars. This is due to the time-varying potential, tides, asymmetric drift to a lower extent, and the internal evolution of the stellar association (although the collisionless aspect of the code and the softening of the gravitational potential at the resolution of the grid introduce biases in the binding of the stellar structures).

A few Myr later, the resulting P2 is found on an orbit very close to that of P1, another cloud that formed along the edge of the bar. The two progenitors are then accelerated along the leading side of the bar (bottom on the right-hand panel of Fig. 12) with a relative velocity of  $85 \text{ km s}^{-1}$ . While leaving the tip of the bar, the clouds gravitationally capture each other and interact for the first time ( $t = 795$  Myr), 5 Myr before the instant of Fig. 11, which corresponds to the mean age of the stars in the resulting cluster (Fig. 9). The combined mass of the two clouds reaches  $6 \times 10^6 M_\odot$ , i.e. the regime of molecular complexes. The relative velocity of the two progenitors is higher than that observed in the Milky Way spiral arms (Fukui et al. 2014), highlighting again the peculiar dynamics of the tips of the bar.

Fig. 13 shows that the interaction of the two progenitors induces a rapid rotation of the merger (anticlockwise in Fig. 11) in their orbital plane, i.e. the plane of the galactic disc. The innermost  $\sim 3$  pc of the merger host a complex velocity field resulting from the overlap of the internal fields of the two dense structures visible in Fig. 11, as well as that of the tidal bridge connecting them. At larger distances, we find tangential velocities of the order of  $30 \text{ km s}^{-1}$  (and locally up to  $100 \text{ km s}^{-1}$ ), followed by a Keplerian decrease up to the point ( $\sim 100$  pc) where kpc-scale dynamics takes over in setting the velocity field. Conversely, a ‘control’ cloud of comparable central density, in the same environment, and which has not experienced any recent interaction, does not exhibit such rapid rotation. Instead, motions around the control cloud are mainly radial ( $\sim 20 \text{ km s}^{-1}$ ), reflecting the on-going accretion of surrounding gas.

During the cloud–cloud collision event, the increase in density and pressure triggers the bulk of star formation over  $\sim 20$  pc, while the densest parts of the clouds continue spiralling around each other (as visible in Fig. 11). This agrees with the observational and theoretical works which showed that such events could trigger an episode of star formation (among others, see Loren 1976; Tan 2000; Furukawa et al. 2009; Tasker & Tan 2009; Inoue & Fukui 2013). On top of increasing the star formation rate (SFR), collisions are also suspected to gather the physical conditions for the formation of massive stars (Anathpindika 2010; Motte et al. 2014; Takahira, Tasker & Habe 2014). Although this aspect cannot be probed in our simulation, it suggests that the kpc-scale dynamics of the bar, through cloud–cloud collisions, could lead to the formation of massive stars in excess with respect to those formed in other, more quiescent environments. This excess could either reflect a size-of-sample effect in which the production of more stars overall is likely to sample out

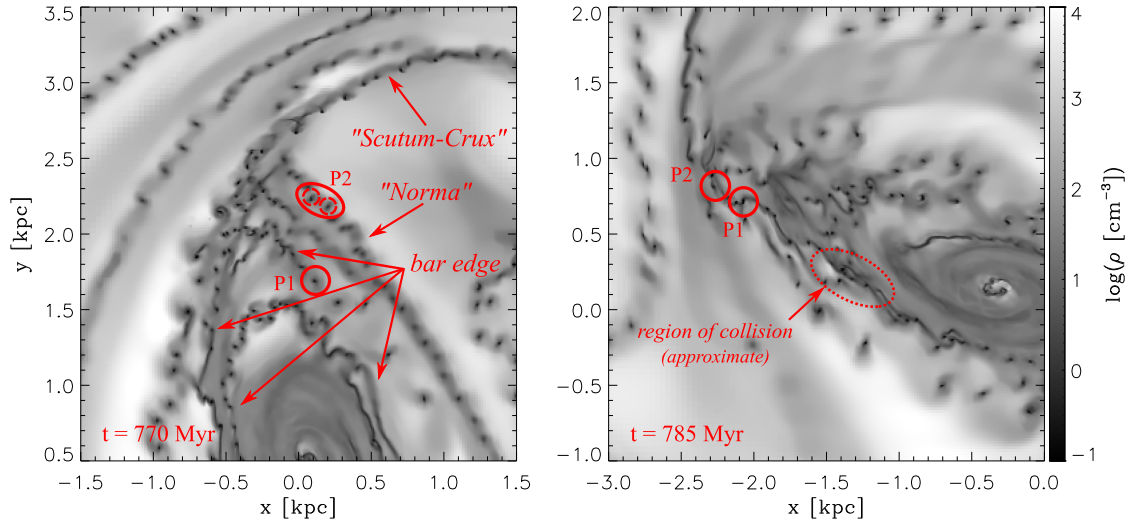

**Figure 12.** Positions of the cloud progenitors of the cloud–cloud collision, 30 Myr (left) and 15 Myr (right) before the instant showed in Fig. 11. The ‘P1’ object is formed along the edge of the bar, while the other one (‘P2’) originates from a beads-on-a-string structure in one spiral arm. The two meet at the extremity of the bar. The progenitor ‘P2’ is itself the result of the collision of smaller clouds that occur between the two moments pictured here. The Scutum-Crux and Norma spiral arms are visually identified with those of the real Galaxy, only for the sake of clarity. The label ‘bar edge’ points to elongated gas structures associated with the bar, i.e. not spirals.

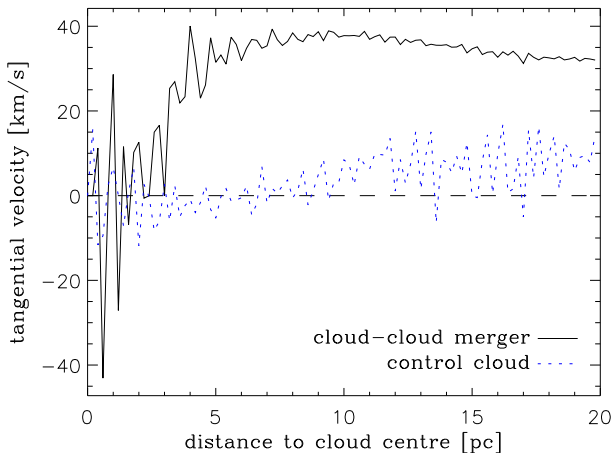

**Figure 13.** Tangential velocity of the gas surrounding the cloud–cloud merger shown in Fig. 11, compared to that of a ‘control’ cloud which has not experienced any recent interaction. Distances and velocities are computed in the reference frame of the cloud centre of mass. The merger exhibits a rapid rotation (with a complex behaviour in the central  $\sim 3$  pc), induced by the cloud–cloud interaction, while the rotation of the control cloud is several times slower.

further into the high-mass tail of the initial mass function (IMF), or it could reflect a real change in the IMF towards a statistically significant increase in the ratio of high- to low-mass stars.

Fig. 14 shows a Schmidt–Kennicutt diagram of the pre- and post-collision stages, comparing the progenitors and the merger to all the clouds in the simulation. By applying a density selection<sup>2</sup>

<sup>2</sup> Note that we use this approach to minimize the numerical noise and the effect of star formation stochasticity, which becomes significant at the scale of individual clouds in our simulation. By using a density threshold and thus focusing on the densest regions of molecular clouds ( $\sim 5$ – $10$  pc), our method differs from observational methods where a beam of fixed size is used, which explains slight differences in the normalization of the relations shown in Fig. 14 and the literature. See Kraljic et al. (2014) for a more observation-oriented approach.

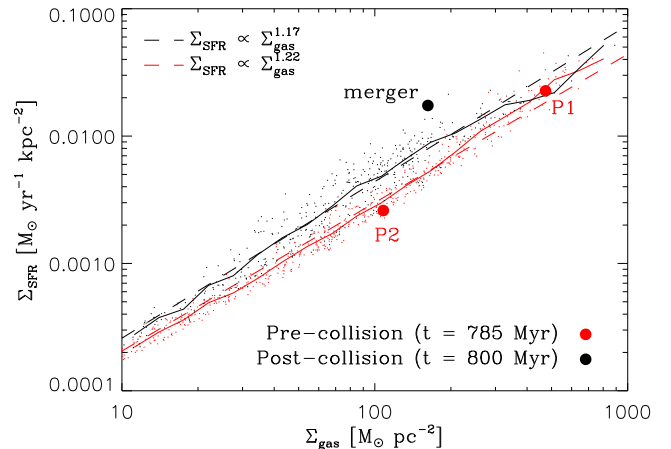

**Figure 14.** Schmidt–Kennicutt diagram of all the clouds in the simulation, highlighting the progenitors and their merger of the cloud–cloud collision discussed in the text. Surface densities are computed using the dense phase only ( $>2000$  cm $^{-3}$ ) at the scale of 50 pc. The dashed lines indicate power-law fits to all the clouds, and the solid lines show the average values.

above  $2000$  cm $^{-3}$ , we find that, before the collision, P1 is among the most massive clouds ( $2 \times 10^6 M_{\odot}$ ), while P2 is closer to average ( $4 \times 10^5 M_{\odot}$ ). Their Mach numbers are comparable with that of the bulk of the clouds, i.e. in the transonic regime ( $\approx 0.8$  at the scale of 24 pc). After the P1–P2 collision, most of the clouds in the simulation have fragmented further and formed their star clusters. This translates into a mild shift of the Schmidt–Kennicutt relation towards higher surface densities of gas and SFR. The remnant of the P1–P2 collision weighs  $5 \times 10^6 M_{\odot}$  (in dense gas), and yields a higher Mach number than its progenitors ( $\approx 1.3$ ). This translates in the Schmidt–Kennicutt diagram as the merger hosting a more efficient star formation (i.e. a shorter gas depletion time) than average. This confirms the predictions of Renaud, Kraljic & Bournaud (2012) that supersonic turbulence increases the efficiency of the conversion of gas into stars or in other words, decreases the gas depletion time (see also Kraljic et al. 2014). We note that such



evolution is comparable to that of galaxies jumping from the regime of isolated discs to that of starburst during a galaxy–galaxy interaction (Renaud et al. 2014, see also Daddi et al. 2010).<sup>3</sup> We also note that the morphology of collapsing beads-on-a-string seen in the spiral arms in our simulation suggests that most star formation over the galactic disc is spontaneous and not triggered by a collision between two large clouds.

In term of complex formation history, extreme mass, and because of its location close to the tip of the bar, our object resembles the observed complex W43 which is thought to originate from multiple cloud accretion events. In particular, Motte et al. (2014) proposed that W43 could have been formed through the accretion of clouds from the nearby Scutum-Centaurus spiral arm. Carlhoff et al. (2013) noted a strong rotation of the main cloud of the W43 complex, together with elongated, arm-like, structures. These are further hints of a recent collision, in line with the formation scenario proposed from our simulation. We note that the orbit of our W43-analogue maintains it along the edge of the bar and at the tips, so that it does not experience the strong shear seen inside the bar. This confirms the suggestion from Carlhoff et al. (2013) that W43 is stable against shear, and could survive several 10 Myr before being destroyed by stellar feedback or tidal effects.

Despite a few differences,<sup>4</sup> the formation of our object yields remarkable similarities to that of W43. In that sense, without providing a perfect match, our simulation would picture a W43-analogue, confirming the possibility of the scenario invoking accretion and collision of (at least) two clouds. In our simulation, some events taking place before the main collision itself have led to the formation and ejection of several loosely bound or unbound stellar associations over the last  $\sim 30$  Myr. A fraction of this stellar population might be identified as the red supergiant clusters (RSGC) detected in the vicinity of W43 (Negueruela et al. 2010, 2012; González-Fernández & Negueruela 2012; González-Fernández et al. 2012). This would then confirm the hypothesis of Motte et al. (2014) that these observed objects ( $\approx 20$  Myr old) originate from previous star forming events in W43 and have decoupled from the molecular complex at an early stage. A more detailed analysis of this point would require a collisional treatment of gravitation, which is not included in our simulation.

Although cloud–cloud interaction are frequent at the tip of the bar due to orbital crowding, the formation of an object as massive as W43 remains a rare event. In particular, we have not found a comparable structure at the other extremity of the bar despite a strong symmetry of the large scale galactic features (bar and spiral arms). The same situation occurs in observations, where no W43-equivalent has been detected at the remote extremity of the bar.

### 3.5 Cloud-star decoupling

#### 3.5.1 Process

Bash, Green & Peters (1977) and Bash (1979) found that stars remain associated with the cloud in which they formed for 30–40 Myr. After this, they decouple from the gas structures, either because the cloud gets destroyed by feedback, or because large-scale dynamics makes the orbits of the stellar and gas component diverge.

<sup>3</sup> Pushing the analogy further would require to check that the turbulence of the merger is dominated by its compressive mode. However, the resolution of our simulation forbids such analysis at the scale of molecular clouds.

<sup>4</sup> In particular, the observed object is younger (1 Myr) than the simulated one, and found closer to the extremity of the bar.

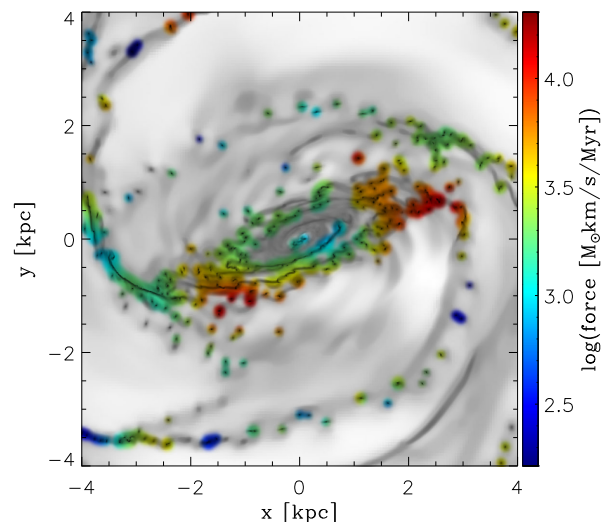

**Figure 15.** Map of the decoupling force between the stars and the gas clouds, overlaid on the gas density map (in grey-scale) at  $t = 800$  Myr. Red areas indicate that stars are efficiently decoupled from the cloud in which they formed. (See text and Appendix A.)

Such effect is indeed present in our simulation, as an asymmetric drift of young stars in the spiral arms (see Renaud et al. 2013, their section 4.5). In the vicinity of the bar, i.e. at smaller galactic radii, the time-scale of the asymmetric drift is shorter, and other dynamical aspects like shear and tides must also be taken into account in the decoupling process.

To understand to what extent young stars can be used to probe the physical conditions of their formation sites, we measure the intensity of a ‘decoupling force’ that we define as the velocity of a young star ( $< 10$  Myr) with respect to its closest cloud, divided by the age of the star and multiplied by its mass (see Appendix A for details). Fig. 15 shows that the decoupling force is the strongest at the tips of the bar and, to a lower extent, stronger along the edge of the bar than in spiral arms, as expected.

On top of the usual decoupling effect due to the dissipative nature of the gas, kpc-scale dynamics accelerates the drift of stars away from their birth places. Along the edge of the bar (parallel to the major axis), the small galactocentric distance implies an enhanced effect of tides. However, the higher density of (massive) clouds and star clusters due to orbital crowding at the extremities of the bar also induces a significant cloud–cloud tidal effect (with signatures as those shown in Fig. 11 in the most extreme cases). The tidal force<sup>5</sup> is locally up to six times stronger in between the nearby clouds at the tips of the bar than along the bar edge.

Shear in the dense regions is of comparable amplitude at the extremities and along the edge of the bar, but varies significantly when considering less dense media ( $\lesssim 500 \text{ cm}^{-3}$ ), as noted by Elmssellem et al. (2015).

Finally, the combination of locally strong tides, shear and the dissipative nature of the gas enhances significantly the decoupling of stars from their cloud progenitors at the tips of the bar, with respect to any other region in the galaxy. Young stars are thus likely to be observed far from their gas nursery once they have passed by the extremities of the bar. This aspect makes the interpretation of

<sup>5</sup> Computed as first-order finite differences of the gravitational force at the scale of 24 pc.

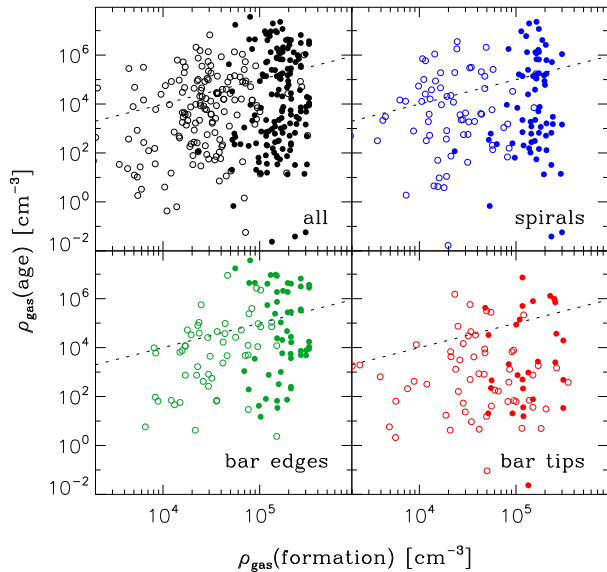

**Figure 16.** Gas density at the position of the stars forming at  $t = 790$  Myr (filled circles), and stars forming at  $t = 770$  Myr (empty circles), taken at the time of their formation on the horizontal axis, and at  $t = 800$  Myr on the vertical axis. Dotted lines indicate equality of the two densities. Only a fraction of stars is shown, for the sake of clarity. The top-left panel shows stars independently of their location in the galaxy, while the other three panels are subsets in specific formation regions (identified visually).

observational data in this environment even more challenging than previously thought.

### 3.5.2 Results

In Fig. 16, we compare the gas densities at the positions of stars (hereafter the ambient density) at the time of their formation with that 10 and 30 Myr later. In practice, we select stars younger than 1 Myr at  $t = 770$  Myr and identify them at  $t = 800$  Myr. They constitute our 30 Myr-old sample. The ambient density is that of the gas cell in which the star particle is found. We repeat the exercise by selecting young stars at  $t = 790$  Myr and identifying them at  $t = 800$  Myr to get our 10 Myr-old sample.

The evolution of the galaxy between  $t = 770$  Myr and  $t = 790$  Myr and the on-going collapse of clouds already noticed in Fig. 14 translate here into a rise of the average ambient density (i.e. an offset of the filled symbols to the right in Fig. 16). Fig. 17 shows the cumulative fraction of the stars as a function of the ambient density ratio (density at formation divided by density 10 or 30 Myr later).

The gas density at the time of formation is fairly independent of the environment (spiral versus bar). For about one third of the stars, the ambient density increases with time: either the star remains in the central region of its cloud which keeps collapsing, or the star orbit makes it fly through the central region. For the other two thirds, the ambient density drops as the stars age, as a result of feedback dissolving the cloud, and/or of the cloud-star decoupling. As discussed above, the decoupling effect is environment-dependent, and so is the ambient density drop.

The picture is made more complicated by the environmental dependence of the density around the cloud itself. Since the scale of molecular clouds is comparable to the tangential extent of a gaseous spiral arm, once a star leaves a cloud there, it also leaves the arm (see Renaud et al. 2013, their fig. 14). Therefore, its ambient density drops from that of the cloud centre ( $\sim 10^{4-6} \text{ cm}^{-3}$  in our simulation)

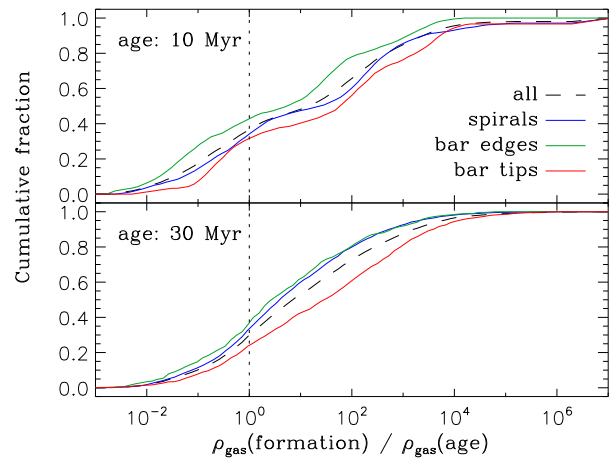

**Figure 17.** Cumulative fraction of stars as a function of the ratio of ambient gas densities between the time of star formation and 10 Myr (top) or 30 Myr (bottom). In all cases, the majority of the stars experience a decrease of the ambient gas density, and this already after only 10 Myr.

to that of the interarm region ( $\sim 1 - 10 \text{ cm}^{-3}$ ) within a few 10 Myr. At the tip of the bar however, the intercloud medium remains relatively dense ( $\sim 10^2 \text{ cm}^{-3}$ , recall Fig. 2). Therefore, when a star leaves its cloud there, it experiences a less abrupt change of its ambient density. As a result, the stronger decoupling effect in the bar than in spirals (Fig. 15) is *partially* balanced by a less abrupt variation of the ambient density.

Stars formed at the edge of the bar experience an intermediate effect between those in the bar extremities and in the spirals. The rapid transit of stars along the bar edges due to the fast orbital motion on  $x_1$ -orbits also implies that they will experience the strong decoupling effect found at the tips within the first  $\sim 20$  Myr of their life (recall Section 3.2).

In conclusion: compared to stars in spiral arms, a larger fraction of the stars formed at the tip of the bar evolve into a low-density medium (Fig. 17). Despite a denser intercloud medium, the ambient density after a given period of evolution (10 or 30 Myr) is on average lower in the bar than in spiral (Fig. 16).

### 3.5.3 Implications

On top of the mere divergence in spatial distribution of the young stars relative to their birth places, the decoupling plays a potentially important role on the effects of feedback. In all regions, the decoupling effect is already measurable in the first 10 Myr of the star life, i.e. even before the SN blasts (set at 10 Myr after star formation in our simulation). This implies that the feedback energy is not injected in the densest regions of clouds, but rather at their periphery or even in the intercloud medium. SN bubbles can then expand more easily in a relatively low-density medium (Chevalier 1977), and potentially drive galactic fountains or outflows. At first order, the net feedback effect on the ISM thus depends mainly on two factors: (i) how fast a star decouples from its cloud (Fig. 15), and (ii) how dense the ISM surrounding the cloud is (Figs 16 and 17).

This decoupling aspect is not retrieved in most of the other simulations. On the one hand, simulations of the ISM or of isolated clouds miss the large-scale dynamics of the galaxy and thus the very drivers of the decoupling (asymmetric drift, shear, tides). On the other hand, the decoupling scales ( $\sim 10 \text{ pc}$ ) are not resolved by

the simulations of large cosmological volumes. The injection of feedback is thus inaccurate in both cases.

The decoupling effect in bars that we noted could play a role in removing low-angular momentum gas via outflows (or fountains) at early stages of galaxy formation, as proposed by Brook et al. (2012). The low-angular momentum gas, sitting at small galactic radii, ultimately gives rise to overly massive bulges and peaked rotation curves, in contrast to observed galaxies. This so-called angular momentum problem has plagued galaxy formation simulations for decades (e.g. Navarro & White 1994; Abadi et al. 2003; Governato et al. 2007; Scannapieco et al. 2009; Übler et al. 2014; Agertz & Kravtsov 2015). Strong stellar feedback provides a solution, although this may have a detrimental effect on galactic thin disc formation (Roškar et al. 2014). By allowing for SN feedback to more efficiently blow out pockets of low-density gas in specific galactic regions, cloud-star decoupling in bars could be an important ingredient in alleviating the problem.

Reality is much more complex than the picture we draw up here. The ISM is clumpy and non-uniform, making feedback bubbles asymmetric. Furthermore, clustered star formation implies that multiple, asynchronous, blast waves would interact in a given star forming volume. On top of this, colliding feedback shells and interaction with nearby clouds are likely to trigger star formation and thus subsequent injection of feedback in an already altered medium. A full understanding of the physics of feedback in galactic (or even cosmological) context requires more simulations like ours, which is still very costly. The zoom-in method by Bonnell et al. (2013) is likely to provide insights into this topic (see also Rey-Raposo, Dobbs & Duarte-Cabral 2015).

## 4 DISCUSSION AND CONCLUSIONS

We use a hydrodynamical simulation of a Milky Way-like galaxy to probe the role of the bar environment in triggering and regulating the formation of clouds and stars. Our approach consists in connecting kpc-scale processes with the formation and early evolution of parsec-scale structures. Our main conclusions are:

- (i) The leading edges of the bar yield converging flows and large-scale shocks that favour the gathering of dense gas in kpc-long filaments, confirming the results of Athanassoula (1992) and others. Furthermore, these regions host supersonic turbulence which then helps the fragmentation of these filaments into clouds.
- (ii) The tangential velocity gradient at the edge of the bar is much weaker than in innermost regions, while the radial component yields shocks. Such differences explain that gas clumps are likely to survive at the edge but not inside the bar.
- (iii) The orbital pattern in the bar creates a fast circulation of matter along the bar. While going from one tip to the other takes only 20 Myr, the gas slows down at both tips and accumulates there.
- (iv) Because of the high velocities along the bar, the objects older than  $\sim 10$  Myr have formed in a different environment and under different physical conditions than the ones they are when observed.
- (v) Orbital crowding at the tip of the bar leads to cloud–cloud collisions that can form massive molecular complexes like W43 and massive stellar associations ( $\sim 10^6 M_{\odot}$ ). Such objects remain at the tip of the bar for a rather short period ( $\sim 10$  Myr or less) after their formation.
- (vi) A cloud–cloud collision increases the rotation of the merger, the turbulent Mach number inside the cloud and the efficiency of star formation, in a comparable way as galaxy mergers.

- (vii) Young stars decouple from their gas cloud more efficiently at the tips of the bar than along the edge or in spiral arms. Such aspect can affect the net effect of stellar feedback, possibly even at galactic scale.

All together, these points illustrate the paramount effect of the fast dynamical evolution connected to the bar: stars even only a few 10 Myr old can be found in a very different environment than the one they formed in. Tips of the bar play an important part in this picture. Either they host clouds long enough to witness their collapse and star formation, or they gather physical conditions allowing star formation events (like cloud–cloud collisions). In the latter case, the actual event can occur a few Myr later, while the clouds already exited this particular region.

The processes we highlight are likely to be altered in weaker bars (but see Zhou, Cao & Wu 2015, and references therein) or by the presence of multiple bars, especially if they rotate at different speed (Wozniak et al. 1995), e.g. by changing the large-scale velocity field. Active star forming regions, comparable to those we analysed, have been observed at the extremities of bars of several galaxies, like NGC 1097 (Ondrechen & van der Hulst 1983), NGC 1433, NGC 1512, and NGC 5383 (Athanassoula 1992).

Kraljic, Bournaud & Martig (2012) showed that, although bars are short-lived at high redshift ( $z > 1$ ), those formed at  $z \approx 0.8 - 1$  survive for long periods. They evolve through the accretion of intergalactic gas that they re-distribute within the galactic disc via gravitational torques (Bournaud, Jog & Combes 2005). According to the classification of bars in isolated galaxies proposed by Verley et al. (2007), the case modelled here is representative of the most common class (their group E). The evolution scenario in Verley et al. (2007) suggests such bar would weaken and even be destroyed by gas infall. Therefore, simulations at parsec resolution and in cosmological context are needed to establish the frequency and the importance of the aspects we presented here in the special case of our Milky Way-like simulation.

## ACKNOWLEDGEMENTS

We thank the reviewer for a report that helped improve the clarity of the paper. This work was granted access to the PRACE Research Infrastructure resource *Curie* hosted at the TGCC, France (PRACE project ra-0283), and national GENCI resources (projects 2013, 2014, 2015-GEN2192). FR and FB acknowledge support from the European Research Council through grant nos. ERC-StG-335936 and ERC-StG-257720. EA acknowledges financial support from the People Programme (Marie Curie Actions) of the European Union's Seventh Framework Programme FP7/2007-2013/ under REA grant agreement no. PITN-GA-2011-289313 to the DAGAL network and from the CNES (Centre National d'Etudes Spatiales – France). FC acknowledges the European Research Council for the Advanced Grant Programme no. 267399-Momentum. KK acknowledges support from grant Spin(e) ANR-13-BS05-0005 of the french ANR.

## REFERENCES

- Abadi M. G., Navarro J. F., Steinmetz M., Eke V. R., 2003, *ApJ*, 597, 21
- Agertz O., Kravtsov A. V., 2015, *ApJ*, 804, 18
- Anathpindika S. V., 2010, *MNRAS*, 405, 1431
- Athanassoula E., 1992, *MNRAS*, 259, 345
- Athanassoula E., 2013, in Falcon-Barroso J., Knapen J. H., eds, *Secular Evolution of Galaxies*. Cambridge Univ. Press, Cambridge
- Bash F. N., 1979, *ApJ*, 233, 524
- Bash F. N., Green E., Peters W. L., III, 1977, *ApJ*, 217, 464



- Bonnell I. A., Dobbs C. L., Smith R. J., 2013, *MNRAS*, 430, 1790
- Bournaud F., Jog C. J., Combes F., 2005, *A&A*, 437, 69
- Brook C. B., Stinson G., Gibson B. K., Roškar R., Wadsley J., Quinn T., 2012, *MNRAS*, 419, 771
- Carlhoff P. et al., 2013, *A&A*, 560, A24
- Chemin L., Renaud F., Soubiran C., 2015, *A&A*, 578, A14
- Chevalier R. A., 1977, *ARA&A*, 15, 175
- Combes F., Gerin M., 1985, *A&A*, 150, 327
- Contopoulos G., Grosbøl P., 1989, *A&AR*, 1, 261
- Daddi E. et al., 2010, *ApJ*, 714, L118
- Dobbs C. L., Pringle J. E., Burkert A., 2012, *MNRAS*, 425, 2157
- Duc P.-A., Renaud F., 2013, in Souchay J., Mathis S., Tokieda T., eds, *Lect. Notes Phys.*, Vol. 861, *Tides in Colliding Galaxies*, Springer Verlag, Berlin, p. 327
- Elmegreen B. G., Elmegreen D. M., 1983, *MNRAS*, 203, 31
- Emsellem E., Renaud F., Bournaud F., Elmegreen B., Combes F., Gabor J. M., 2015, *MNRAS*, 446, 2468
- Federrath C., Roman-Duval J., Klessen R. S., Schmidt W., Mac Low M.-M., 2010, *A&A*, 512, A81
- Federrath C., Sur S., Schleicher D. R. G., Banerjee R., Klessen R. S., 2011, *ApJ*, 731, 62
- Fujimoto Y., Tasker E. J., Wakayama M., Habe A., 2014, *MNRAS*, 439, 936
- Fukui Y. et al., 2014, *ApJ*, 780, 36
- Furukawa N., Dawson J. R., Ohama A., Kawamura A., Mizuno N., Onishi T., Fukui Y., 2009, *ApJ*, 696, L115
- González-Fernández C., Negueruela I., 2012, *A&A*, 539, A100
- González-Fernández C., López-Corredoira M., Amôres E. B., Minniti D., Lucas P., Toledo I., 2012, *A&A*, 546, A107
- Governato F., Willman B., Mayer L., Brooks A., Stinson G., Valenzuela O., Wadsley J., Quinn T., 2007, *MNRAS*, 374, 1479
- Hughes A. et al., 2013, *ApJ*, 779, 44
- Inoue T., Fukui Y., 2013, *ApJ*, 774, L31
- Kenney J. D. P., Lord S. D., 1991, *ApJ*, 381, 118
- Kraljic K., Bournaud F., Martig M., 2012, *ApJ*, 757, 60
- Kraljic K., Renaud F., Bournaud F., Combes F., Elmegreen B., Emsellem E., Teyssier R., 2014, *ApJ*, 784, 112
- Kritsuk A. G., Norman M. L., Padoan P., Wagner R., 2007, *ApJ*, 665, 416
- Longmore S. N. et al., 2013, *MNRAS*, 429, 987
- Loren R. B., 1976, *ApJ*, 209, 466
- Louvet F. et al., 2014, *A&A*, 570, A15
- Martin P., Friedli D., 1997, *A&A*, 326, 449
- Motte F., Schilke P., Lis D. C., 2003, *ApJ*, 582, 277
- Motte F. et al., 2014, *A&A*, 571, A32
- Navarro J. F., White S. D. M., 1994, *MNRAS*, 267, 401
- Negueruela I., González-Fernández C., Marco A., Clark J. S., Martínez-Núñez S., 2010, *A&A*, 513, A74
- Negueruela I., Marco A., González-Fernández C., Jiménez-Esteban F., Clark J. S., García M., Solano E., 2012, *A&A*, 547, A15
- Nguyen Luong Q. et al., 2011, *A&A*, 529, A41
- Ondrechen M. P., van der Hulst J. M., 1983, *ApJ*, 269, L47
- Piner B. G., Stone J. M., Teuben P. J., 1995, *ApJ*, 449, 508
- Prendergast K. H., 1983, in Athanassoula E., ed., *IAUS 100: Internal Kinematics and Dynamics of Galaxies*, Reidel, Dordrecht, p. 215
- Renaud F., Kraljic K., Bournaud F., 2012, *ApJ*, 760, L16
- Renaud F. et al., 2013, *MNRAS*, 436, 1836
- Renaud F., Bournaud F., Kraljic K., Duc P.-A., 2014, *MNRAS*, 442, L33
- Rey-Raposo R., Dobbs C., Duarte-Cabral A., 2015, *MNRAS*, 446, L46
- Rodriguez-Fernandez N. J., Combes F., 2008, *A&A*, 489, 115
- Roškar R., Teyssier R., Agertz O., Wetzstein M., Moore B., 2014, *MNRAS*, 444, 2837
- Scannapieco C., White S. D. M., Springel V., Tissera P. B., 2009, *MNRAS*, 396, 696
- Sheth K., Vogel S. N., Regan M. W., Teuben P. J., Harris A. I., Thornley M. D., 2002, *AJ*, 124, 2581
- Skokos C., Patsis P. A., Athanassoula E., 2002, *MNRAS*, 333, 847
- Solomon P. M., Rivolo A. R., Barrett J., Yahil A., 1987, *ApJ*, 319, 730
- Takahira K., Tasker E. J., Habe A., 2014, *ApJ*, 792, 63
- Tan J. C., 2000, *ApJ*, 536, 173
- Tasker E. J., Tan J. C., 2009, *ApJ*, 700, 358
- Teyssier R., 2002, *A&A*, 385, 337
- Verley S., Combes F., Verdes-Montenegro L., Bergond G., Leon S., 2007, *A&A*, 474, 43
- Visser H. C. D., 1980, *A&A*, 88, 149
- Wada K., Meurer G., Norman C. A., 2002, *ApJ*, 577, 197
- Wozniak H., Friedli D., Martinet L., Martin P., Bratschi P., 1995, *A&AS*, 111, 115
- Zhou Z.-M., Cao C., Wu H., 2015, *AJ*, 149, 1
- Übler H., Naab T., Oser L., Aumer M., Sales L. V., White S. D. M., 2014, *MNRAS*, 443, 2092

## APPENDIX A: COMPUTATION OF THE DECOUPLING FORCE

To measure the effect of the decoupling of the stars from the gas cloud in which they form, we first identify clouds as density peaks in one snapshot of the simulation. We select the grid cells in which the gas is denser than the star formation threshold ( $2000 \text{ cm}^{-3}$ ). All contiguous selected cells constitute one cloud. Then, we select stars between 2 and 10 Myr old, and identify their closest cloud as their formation site. Choosing older stars could lead to errors in the identification of the formation site. We compute the velocity of the star with respect to the cloud and its radial and tangential component. We reject the stars with a negative radial velocity, as they are moving towards the cloud and do not experience a decoupling effect. The total velocity is then converted into a force, by multiplying it by the mass of the star, and dividing it by the age of the star. Finally, we compute the average force for each cloud over all its stars.

To obtain the map of Fig. 15, we convolve the scattered distribution of the force for each cloud by a Gaussian kernel. We then multiply this map by a smoothed version of the gas density map for graphical purposes only.

This paper has been typeset from a  $\text{\LaTeX}$  file prepared by the author.
